# Supplementary material for: Inhibition of cancer-cell migration by tetraspanin CD9-binding peptide
Source: Royal Society of Chemistry journal article supplement (doi:10.1039/d1cc01295a), 2021-01-01
Supplement: d1cc01295a1.pdf [file d1cc01295a1.pdf]

## Electronic Supplementary Information (ESI)

### Inhibition of cancer-cell migration by tetraspanin CD9-binding peptide

Thanawat Suwatthanarak,<sup>a</sup> Masayoshi Tanaka,<sup>a</sup> Yoshitaka Miyamoto,<sup>b</sup> Kenji Miyado,<sup>b</sup> and Mina Okochi<sup>a\*</sup>

<sup>a</sup> Department of Chemical Science and Engineering, Tokyo Institute of Technology, 2-12-1, O-okayama, Meguro-ku, Tokyo 152-8552, Japan

<sup>b</sup> Department of Reproductive Biology, National Research Institute for Child Health and Development, Tokyo 157-8535, Japan.

\*E-mail: okochi.m.aa@m.titech.ac.jp

#### Alanine scanning and truncation of CD9-BP

A peptide library was generated by mutating each amino acid in CD9-BP (RSHRLRLH) into alanine for alanine scanning and another library was obtained by deleting amino acids at N- or C-terminal portion of CD9-BP for truncation. Next, peptide array was synthesized using fluorenylmethoxycarbonyl (Fmoc)-based chemistry (Watanabe Chemical, Japan) and automated peptide spotter (MultiPep RSi; Intavis, Germany). Synthesis cycle was started with deprotecting Fmoc group at the N-terminus by 20% piperidine in N,N-dimethylformamide (DMF). Fmoc L-form amino acid at 0.5 M was then activated by 1.1 M Hydroxybenzotriazole (HOBt) and 1.1 M N,N'-Diisopropylcarbodiimide, and spotted on a cellulose membrane (grade 542; Whatman, UK), activated with  $\beta$ -alanine as the N-terminal basal spacer. The unreacted amine group was capped by 4% acetic anhydride in DMF before the membrane was washed with DMF and ethanol, respectively, at the end of cycle. Peptide spot was 4 mm in diameter and synthesis scale was 100 nmol/cm<sup>2</sup>. The synthesis was conducted according to manufacturer's instructions with some modifications. Prior to use, the last Fmoc group was manually deprotected by 20% piperidine in DMF, followed by serial washing the membrane with DMF and ethanol. Side chain-protecting groups were later removed using a mixture of ultrapure water, triisopropylsilane (TIPS) and trifluoroacetic acid (TFA) (2/3/95, v/v/v %), followed by sequential washing the membrane with dichloromethane (DCM), DMF, ethanol and phosphate-buffered saline (PBS, pH 7.4). The prepared peptide array was blocked with 1% bovine serum albumin in PBS for 30 min and then used in sandwich binding assay with CD9 (0.3  $\mu$ g/mL in PBS, 1 h, ab152262; Abcam, UK), Anti-CD9 antibody (1/1000 in PBS, 1 h, ab92726; Abcam), and Alexa Fluor<sup>®</sup> 568 secondary antibody (1/1000 in PBS, 1 h, ab175471; Abcam), respectively, at room temperature together with slow agitation. Between each step, the membrane was thoroughly washed with PBS. Fluorescence scanning and imaging of the membrane were done by a biomolecular imager (Typhoon FLA 9500; GE Healthcare, Sweden) and spot intensity was quantified by ImageQuant software (GE Healthcare).

#### Binding site evaluation of CD9-BP on CD9

Firstly, D-form CD9-BP was synthesized in solid phase using H-Rink-Aminde-ChemMatrix<sup>®</sup> resin and an automated microwave peptide synthesizer (Initiator+; Biotage, Sweden). In each elongation, Fmoc group at the N-terminus was deprotected by 20% piperidine in DMF before washing the resin with DMF. The carboxyl group of Fmoc-amino acid at 0.5 M was activated by 0.5 M HOBt, 0.5 M O-(1H-benzotriazol-1-yl)-N,N,N',N'-tetramethyluronium hexafluorophosphate and 0.5 M N,N'-diisopropylethylamine, and next coupled to the N-terminus, followed by washing the resin with DMF. Synthesis was conducted according to manufacturer's instructions with some modifications: the scale was 0.1 mmol. After the final elongation, Fmoc group at the N-terminus was deprotected by 20% piperidine in DMF before washing the resin with DMF and DCM, respectively. Side chain-protecting groups were

removed and the peptide was cleaved from the resin by a mixture of ultrapure water, TIPS, and TFA (2.5/5/92.5, v/v/v %). The peptide was precipitated and washed by chilled diethyl ether. The peptide pellet, obtained from centrifugation at 4°C and 5,000 rpm for 10 min, was dissolved in 30% acetonitrile and freeze-dried. The peptide was purified and confirmed by high-performance liquid chromatography (HPLC) and mass spectrometry (MS) to ensure >90% purity. For the peptide labeling, CD9-BP and Fluorescein-5-Isothiocyanate (FITC 'Isomer I'; Thermo Fisher Scientific, USA) were incubated together with a mole ratio of 1:2 in sodium bicarbonate buffer (pH 8.7) for overnight at room temperature. Then, the FITC-conjugated CD9-BP was purified and confirmed using HPLC and MS. For the binding assay, a library of twelve-mer peptides was derived from the sequence of CD9's LEL (aa112-aa195) by six residue-frame shifted epitope mapping and synthesized on the membrane as described above. The peptide array was soaked into 10 µM FITC-conjugated CD9-BP in PBS for 1 h at room temperature, followed by washing the membrane with PBS. Finally, the membrane was fluorescently scanned and the spot intensity was quantified.

### **SPR experiment**

For the competitive binding analysis of CD9-BP to interaction between EWI-2 and CD9, EWI-2 protein (13435-H08H; Sino Biological, China) was immobilized as a ligand on CM5 sensor chip using amine coupling kit in Biacore X100 Plus Package SPR system (GE Healthcare, Sweden). CD9 was incubated with CD9-BP to obtain 100 nM of CD9 and 0, 10, 100, 500, 100, 2500 or 5000 nM of CD9-BP in PBS for 1 h before the mixture was applied over the EWI-2-immobilized SPR sensor for 120 s. After each binding analysis, the sensor surface was regenerated with 50 mM sodium hydroxide for 60 s.

### **CD9 expression in MDA-MB-231 and NHDF cell lines**

MDA-MB-231 human breast cancer or normal human dermal fibroblast (NHDF) cell line (American Type Culture Collection, USA) was cultured in a 10 cm dish using Dulbecco's modified Eagle medium supplemented with 10% fetal bovine serum (FBS), 1 mM sodium pyruvate, and 100 units/mL of penicillin-streptomycin (Thermo Fisher Scientific) under 37°C, 5% CO<sub>2</sub>, and a humidified atmosphere. At around 80% confluence, the cells were twice washed with PBS and then trypsinized (0.025% trypsin, 3 min, 37°C). The trypsinization was stopped by adding the culture medium and the cell suspension was centrifuged (1,000 rpm, 37°C, 5 min). The cell pellet was collected, washed with PBS, again centrifuged, and resuspended in PBS. The cell suspension was sonicated on ice (Duty cycle: 30%, Output control: 3, 3 min, Branson sonifier 250 advanced; Branson Ultrasonics Corp., USA) to disrupt the cells. The sonicated cell suspension was centrifuged (21,000 × g, 12 min) before the obtained supernatant was ultra-centrifuged (150,000 × g, 4°C, 45 min) to obtain the membrane fraction pellet. The membrane fraction pellet was resuspended in PBS. A bicinchoninic acid assay (TaKaRa Bio Inc., Japan) was performed to determine a protein concentration in the membrane suspension. The membrane suspension (100 µl) diluted to 0.1 µg/mL was subjected to a human CD9 enzyme-linked immunosorbent assay (LifeSpan BioSciences Inc., USA) to determine a CD9 concentration.

### **Effect of CD9-BP on cell viability of MDA-MB-231 and NHDF cell lines**

MDA-MB-231 or NHDF cell line was cultured in a 96-well dish using the same condition as described above. At around 50% confluence, the cultured medium was removed and replaced with the new medium, containing CD9-BP or AAAA peptide (50, 100, 250, 500 or 1,000 nM). AAAA peptide was synthesized in solid phase as mentioned above. After the 24-h additional culture, a cell viability assay was performed using Cell Counting Kit-8 (Dojindo Molecular Technologies, Inc., Japan).

### **Antimigratory effect of CD9-BP to MDA-MB-231 and NHDF cell lines**

For the wound healing assay, MDA-MB-231 or NHDF cell line was cultured in a 24-well dish using the same condition as described above. At almost 100% confluence, the cells were scratched by pipet tips to obtain 1 mm wound before the cultured medium was removed and replaced with the new medium, containing CD9-BP, AAAA or Apamin peptide (50 or 100 nM). Apamin peptide was synthesized in solid phase as mentioned above. A wound gap was observed at 0 h and 24 h after the peptide introduction under a microscope (DMi8; Leica, Germany). For the single cell-tracking migration assay, MDA-MB-231 or NHDF cell line was cultured in a 24-well dish using the same condition as described above. At around 20%, the new medium, containing CD9-BP, AAAA peptide, or apamin at 100 nM, was introduced. During further-12 h incubation, microscopy image of cells was taken every 20 min by a microscope. Analysis of the single cell-tracking migration was done by Fiji, an image processing package based on ImageJ program. For the Boyden chamber assay, CytoSelect™ 96-well Cell Migration Assay with 8 µm-pore size (Fluorometric Format, CBA-106; Cell Biolabs, Inc., USA) was employed. Serum-free cell suspension (100 µL,  $0.3 \times 10^6$  cells/mL) of MDA-MB-231 or NHDF cells was placed in the upper chamber, and 10% FBS-added medium (150 µL) together with a chemoattractant at 100 nM (CD9-BP, AAAA peptide, Apamin peptide, or Anti-CD9 antibody) was placed in the lower well. Epithelial growth factor (AF-100-15; PeproTech, USA) was added to 10% FBS-added medium at 10 nM to increase the cell invasion. After allowing cells to migrate to the other side of membrane under 37°C, 5% CO<sub>2</sub>, and a humidified atmosphere for 24 h, the invasive cells were harvested by cell detachment solution, lysed and quantified by a mixture of lysis buffer, CyQuant®GR dye solution. Microplate reader was finally used to measure fluorescence intensity of the solutions at 480/520 nm. The assay was conducted strictly to manufacturer's instructions.

**Table S1** Characteristics of alanine-substituted and truncated CD9-BP<sup>a</sup>

| Sequence | pI   | GRAVY  | Charge | Structure<br>(+; helix, -; linear,<br>N/A; not available) | Structural image                                                                      |
|----------|------|--------|--------|-----------------------------------------------------------|---------------------------------------------------------------------------------------|
| RSHRLRLH | 12.3 | -1.637 | 3      | +++                                                       |    |
| ASHRLRLH | 12.0 | -0.850 | 2      | ++-                                                       |    |
| RAHRLRLH | 12.3 | -1.312 | 3      | ++-                                                       |    |
| RSARLRLH | 12.3 | -1.012 | 3      | ++-                                                       |   |
| RSHALRLH | 12.0 | -0.850 | 2      | ++-                                                       |  |
| RSHRARLH | 12.3 | -1.887 | 3      | ---                                                       |  |
| RSHRLALH | 12.0 | -0.850 | 2      | ++-                                                       |  |
| RSHRLRAH | 12.3 | -1.887 | 3      | ---                                                       |  |
| RSHRLRLA | 12.3 | -1.012 | 3      | +++                                                       |  |

**Table S1** Characteristics of the alanine-substituted and truncated CD9-BP<sup>a</sup> (Continued).

| Sequence         | pI   | GRAVY  | Charge | Structure<br>(+; helix, -; linear,<br>N/A; not available) | Structural image                                                                      |
|------------------|------|--------|--------|-----------------------------------------------------------|---------------------------------------------------------------------------------------|
| <u>_</u> SHRLRLH | 12.0 | -1.229 | 2      | ---                                                       |    |
| <u>_</u> HRLRLH  | 12.0 | -1.300 | 2      | ---                                                       |    |
| <u>_</u> RLRLH   | 12.0 | -0.920 | 2      | ---                                                       |    |
| <u>_</u> LRLH    | 10.8 | -0.025 | 1      | N/A                                                       | N/A                                                                                   |
| RSHRLRL <u>_</u> | 12.3 | -1.414 | 3      | ---                                                       |  |
| RSHRLR <u>_</u>  | 12.3 | -2.283 | 3      | ---                                                       |  |
| RSHRL <u>_</u>   | 12.0 | -1.840 | 2      | ---                                                       |  |
| RSHR <u>_</u>    | 12.1 | -3.230 | 2      | N/A                                                       | N/A                                                                                   |
| AAAA             | 3.7  | 1.800  | 0      | N/A                                                       | N/A                                                                                   |

<sup>a</sup>Isoelectric point (pI) and charge were obtained from Peptide property calculator (<https://pepcalc.com>) and grand average of hydropathy (GRAVY) value was obtained from GRAVY calculator (<http://www.gravy-calculator.de>). Peptide structure was predicted by PEP-FOLD 3 (<https://mobyli.rpbs.univ-paris-diderot.fr/cgi-bin/portal.py#forms::PEP-FOLD3>). Structure of some peptides could not be predicted because their sequences are too short.

**Table S2** Characteristics of the peptides derived from the LEL of CD9<sup>a</sup>

| Sequence     | pI    | GRAVY  | Charge |
|--------------|-------|--------|--------|
| SHKDEVIKEVQE | 4.52  | -1.367 | -1.9   |
| IKEVQEFYKDTY | 4.32  | -1.133 | -1.0   |
| FYKDTYNKLKTK | 10.18 | -1.667 | 3.0    |
| NKLKTKDEPQRE | 9.43  | -2.683 | 1.0    |
| DEPQRETLKAIH | 5.31  | -1.483 | -0.9   |
| TLKAIHYALNCC | 8.05  | 0.675  | 1.0    |
| YALNCCGLAGGV | 2.77  | 1.200  | -0.1   |
| GLAGGVEQFISD | 0.81  | 0.383  | -2.0   |
| EQFISDICPKKD | 4.17  | -0.825 | -1.1   |
| ICPKKDVLETFT | 6.20  | 0.000  | -0.1   |
| VLETFTVKSCPD | 3.93  | 0.233  | -1.1   |
| VKSCPDAIKEVF | 6.20  | 0.233  | -0.1   |
| AIKEVFDNKFHI | 7.83  | -0.075 | 0.1    |

<sup>a</sup>Isoelectric point (pI) and charge were obtained from Peptide property calculator (<https://pepcalc.com>) and grand average of hydropathy (GRAVY) value was obtained from GRAVY calculator (<http://www.gravy-calculator.de>).

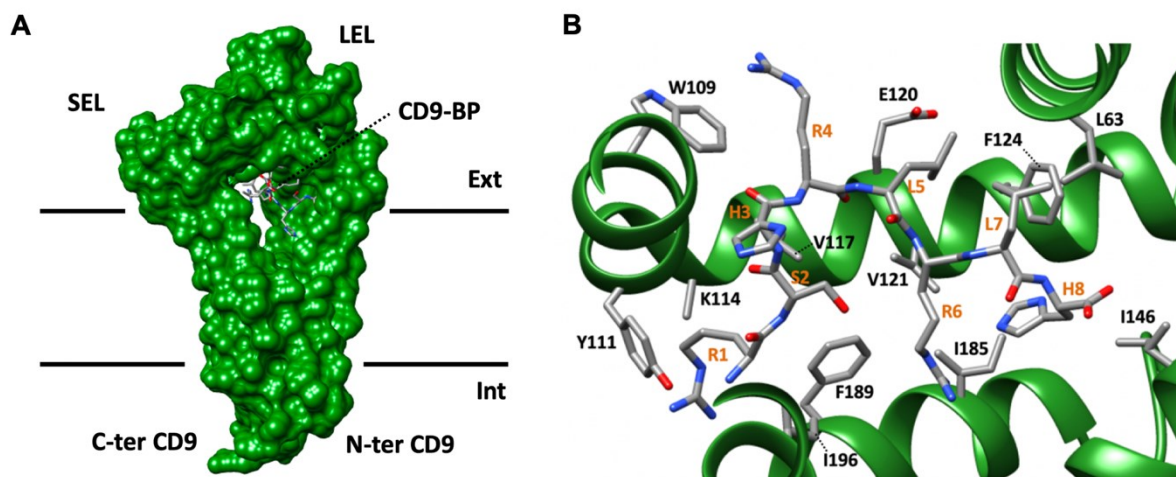

**Figure S1.** Molecular docking results between CD9 and CD9-BP predicted by MDockPeP, an ab-initio protein-peptide docking server. (A) Surface representation of molecular docking between CD9 and CD9-BP. (B) Zoomed view of molecular docking between CD9 and CD9-BP. LEL, large extracellular loop. SEL, small extracellular loop. Ext, extracellular region. Int, intracellular region.

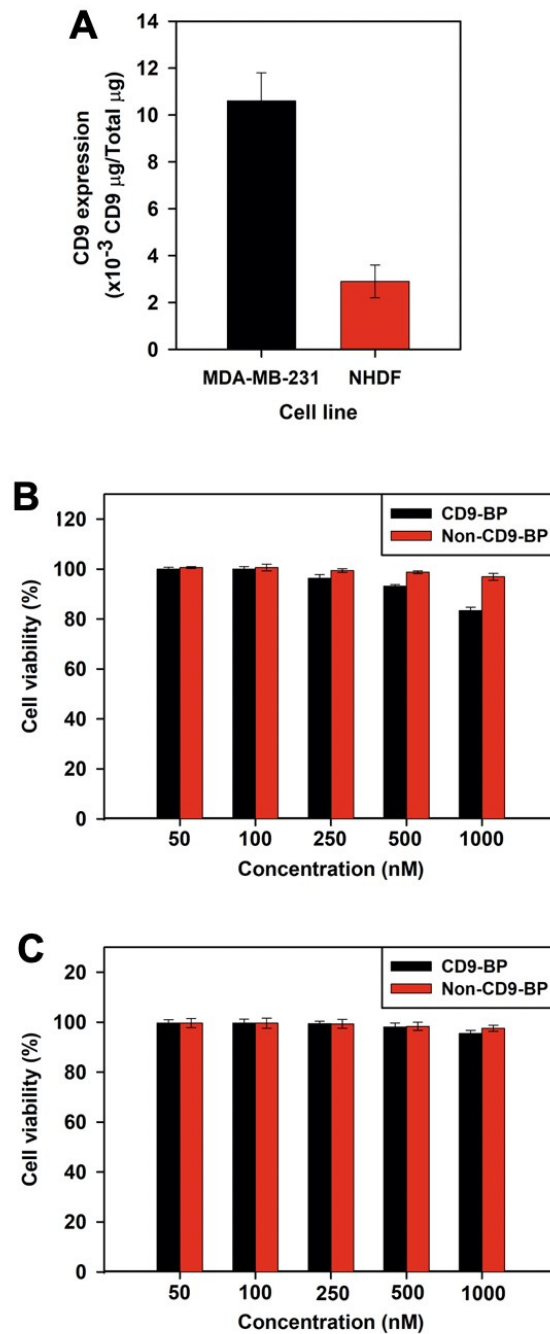

**Figure S2.** (A) Level of CD9 expression in the membrane fraction of MDA-MB-231 and NHDF cell lines. Effect of CD9-BP on cell viability of (B) MDA-MB-231 and (C) NHDF cell lines. Non-CD9-BP or AAAA peptide was a negative control. Error bar represents a standard deviation from triplicate results.



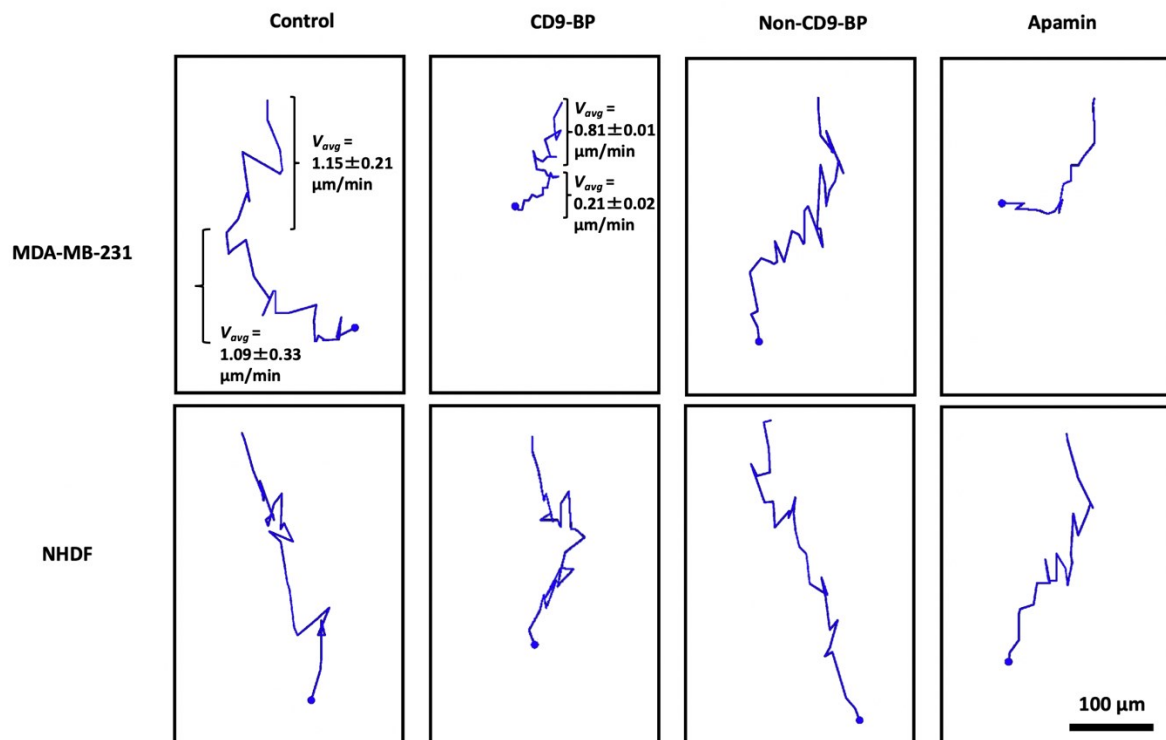

**Figure S3.** Representative trajectories of MDA-MB-231 and NHDF cells in single cell-tracking migration assay. The dot represents the endpoint.  $V_{avg}$ , average velocity.
